# Supplementary material for: A broad range quorum sensing inhibitor working through sRNA inhibition
Source: PubMed Central journal article supplement (PMC5575346; doi:10.1038/s41598-017-09886-8), 2017-08-29
Supplement: 41598_2017_9886_MOESM1_ESM.pdf [file 41598_2017_9886_MOESM1_ESM.pdf]

## Supplementary file

### **A broad range quorum sensing inhibitor working through sRNA inhibition**

Tim H Jakobsen<sup>1#</sup>, Anders N Warming<sup>2</sup>, Rebecca M Vejborg<sup>1</sup>, Joana A Moscoso<sup>3</sup>, Marc Stegger<sup>4</sup>, Frederik Lorenzen<sup>1</sup>, Morten Rybtke<sup>1</sup>, Jens Bo Andersen<sup>1</sup>, Rico Petersen<sup>5</sup>, Paal Skytt Andersen<sup>4</sup>, Thomas E Nielsen<sup>1,5,6</sup>, Tim Tolker-Nielsen<sup>1</sup>, Alain Filloux<sup>3</sup>, Hanne Ingmer<sup>2</sup>, Michael Givskov<sup>1,6</sup>

<sup>1</sup>Costerton Biofilm Center, Department of Immunology and Microbiology, University of Copenhagen, Denmark.

<sup>2</sup>Department of Veterinary Pathobiology, University of Copenhagen, Copenhagen, Denmark.

<sup>3</sup>Centre for Molecular Bacteriology and Infection, Division of Cell and Molecular Biology, Imperial College London, London, UK.

<sup>4</sup>Department of Microbiology and Infection Control, Statens Serum Institut, Copenhagen, Denmark

<sup>5</sup>Department of Chemistry, Technical University of Denmark, Kgs. Lyngby, Denmark

<sup>6</sup>Singapore Centre on Environmental Life Sciences Engineering, Nanyang Technological University, Singapore.

<sup>#</sup>Corresponding author

Department of Immunology and Microbiology, University of Copenhagen, DK-2200 Copenhagen, Denmark. Phone: +4522542727. E-mail: tholm@sund.ku.dk.

## Supplementary figures

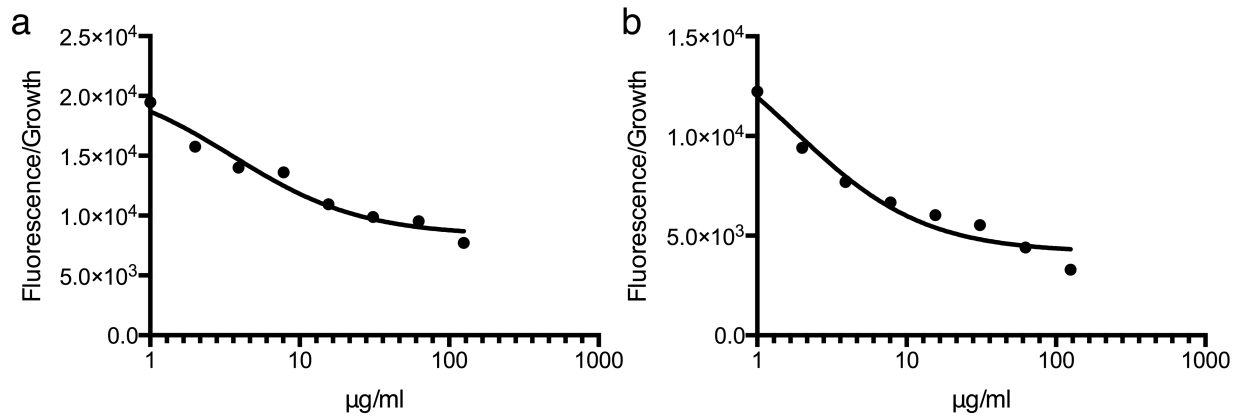

**Figure S1.** The half-maximal inhibitory concentration ( $IC_{50}$ ) for ajoene tested with the following monitor strains: *rsmY-gfp* (a) and *rsmZ-gfp* (b).  $IC_{50}$  values were calculated with the software PRISM (GraphPad®).

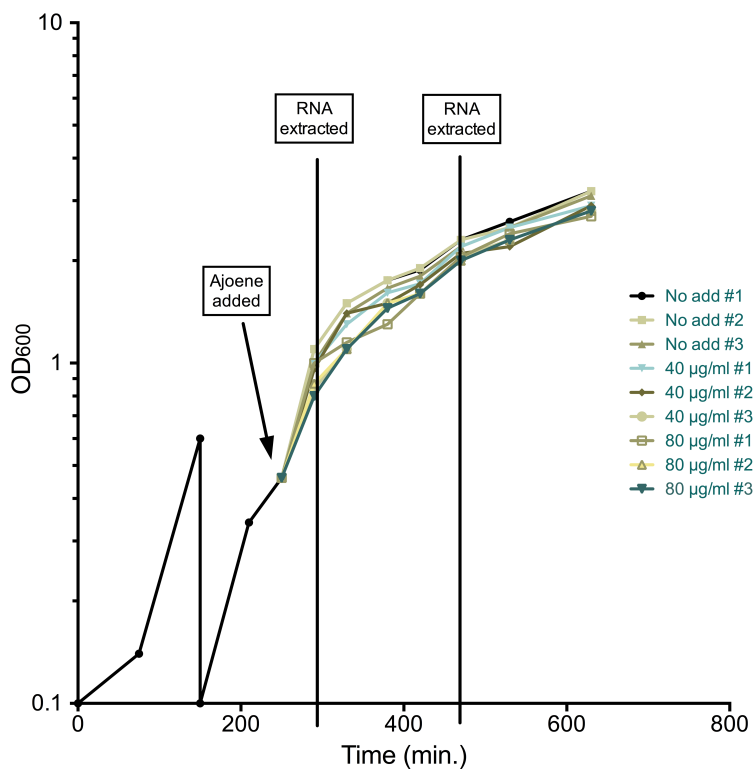

**Figure S2.** Growth of *P. aeruginosa*, PAO1 with and without ajoene. Ajoene tested in following concentrations; 40  $\mu\text{g/ml}$  and 80  $\mu\text{g/ml}$ . Samples for qRT-PCR were collected at late exponential growth phase (300 minutes) and early stationary growth phase (450 minutes). No add: No addition of ajoene.

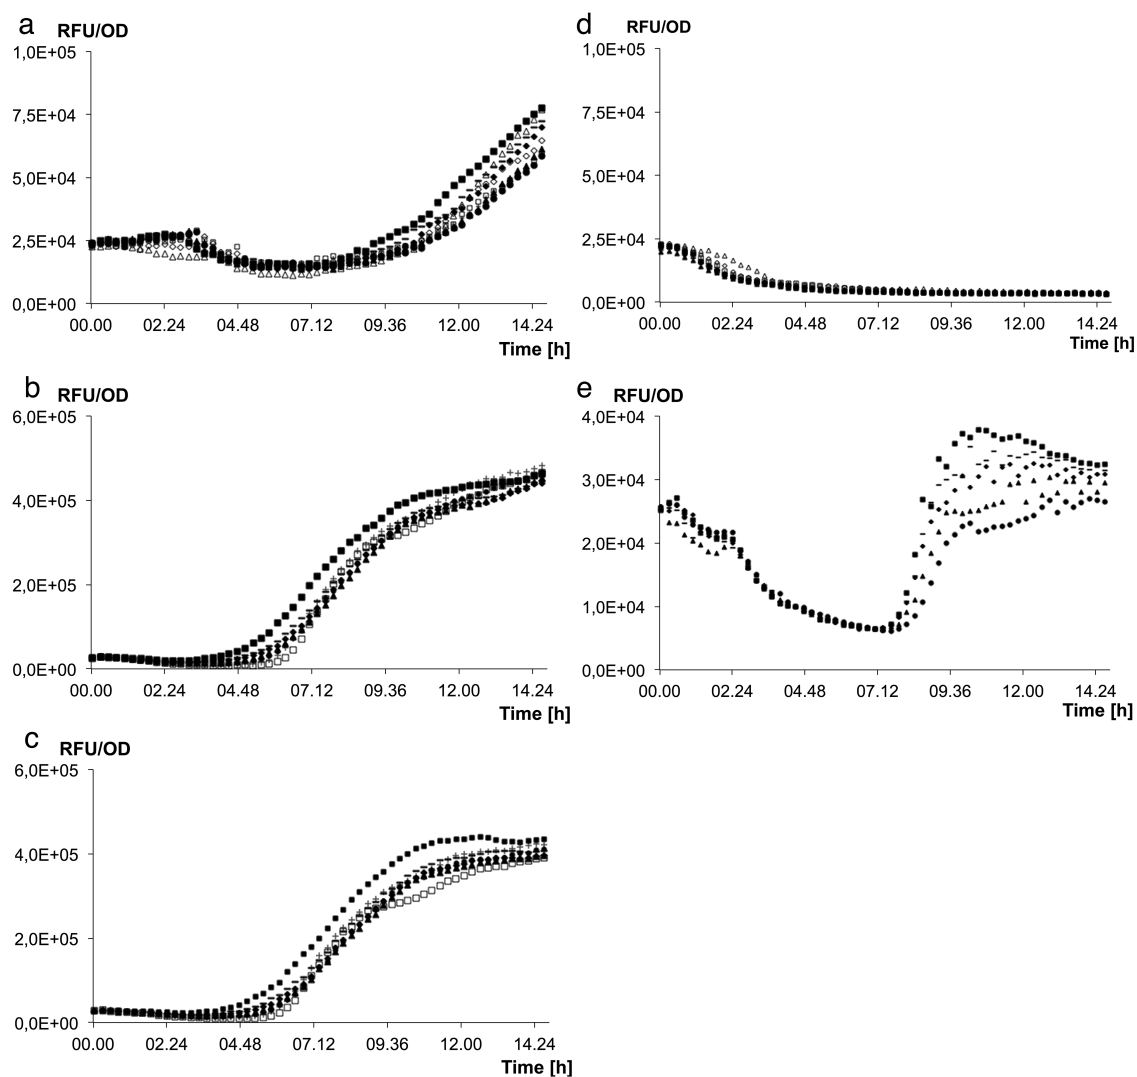

**Figure S3.** Regulation of *lasB* expression in  $\Delta rsmYZ$ ,  $\Delta rsmY$ ,  $\Delta rsmZ$ ,  $\Delta gacA$  and  $\Delta rsmA$  mutants by ajoene. The GFP expression/cell density (RFU/OD) of a *lasB-gfp* translational fusion in following background strains; *rsmYZ* (a), *rsmY* (b), and *rsmZ* (c), *gacA* (d) and *rsmA* (e) tested with following concentrations of ajoene:  $\triangle$ 125  $\mu\text{g/ml}$   $\diamond$ 62,5  $\mu\text{g/ml}$   $\square$ 31,25  $\mu\text{g/ml}$   $\circ$ 15,6  $\mu\text{g/ml}$   $\bullet$ 7,8  $\mu\text{g/ml}$   $\blacktriangle$ 3,9  $\mu\text{g/ml}$   $\blacklozenge$ 2  $\mu\text{g/ml}$   $\blacksquare$ 1  $\mu\text{g/ml}$   $\blacksquare$  No addition of ajoene. The experiments were done in triplicate.

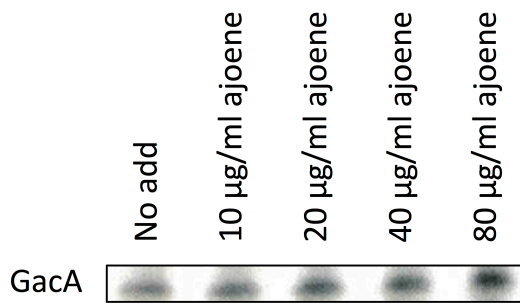

**Figure S4.** Changes in phosphorylation of GacA after treatment with following concentrations of ajoene; 10, 20, 40 and 80 µg/ml measured with Phos-tag gel combined with Western blot. No add: No addition of ajoene.

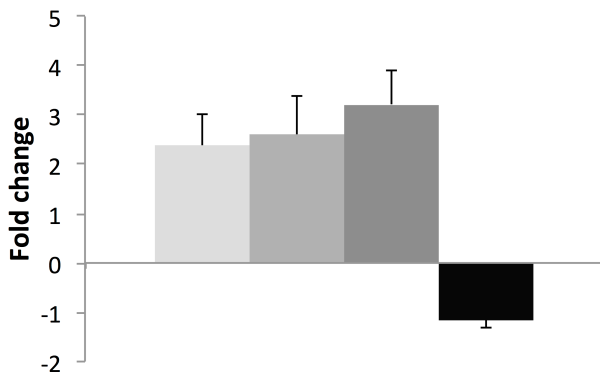

**Figure S5.** Regulation of following non-coding sRNAs, *phrS* (light grey), *prpF* (medium grey) and *prpH* (dark grey) as well as the housekeeping gene, *rpoD* (black) by ajoene in *P. aeruginosa*. qRT-PCR measurements of fold changes at early stationary growth phase (OD<sub>600</sub> of 2.2). The data represent average of three individual experiments. Error bars are means ± SDs.

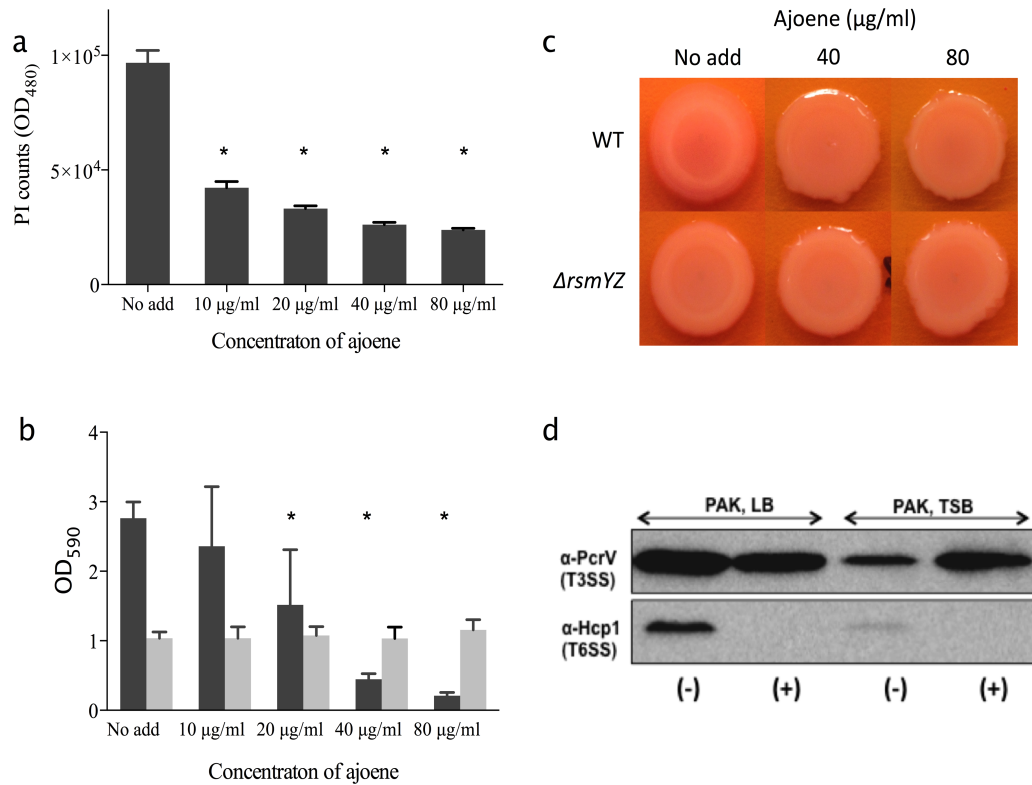

**Figure S6.** Phenotypic traits regulated by ajoene. **a)** Production of eDNA with and without different non-growth inhibiting concentrations of ajoene. The experiments were done in triplicate. There was a significant difference between untreated cultures and all cultures treated ajoene (\*,  $P < 0.0001$ ). No add: No addition of ajoene. PI: Propidium Iodide. Error bars are means  $\pm$  SDs. **b)** Production of static biofilm by a *wt* (dark grey) and a *gacA* mutant (light grey) with and without ajoene supplemented growth medium. The experiments were done in triplicate. There was a significant difference between untreated cultures and cultures treated with 20  $\mu\text{g/ml}$  to 80  $\mu\text{g/ml}$  ajoene (\*,  $P < 0.0001$ ). No add: No addition of ajoene. Error bars are means  $\pm$  SDs. **c)** Production of exopolysaccharide by a WT and *rsmYZ* mutant visualized by bacterial colony staining on Congo red-containing agar plates with and without ajoene added. No add: No addition of ajoene. **d)** Western blot of T3SS and T6SS without and with 80  $\mu\text{g/ml}$  ajoene. Production of various secretion system components were detected by using

antibodies directed against PcrV (T3SS) and Hcp1 (T6SS) in both LB and TSB medium. (-) no ajoene added, (+) ajoene added.

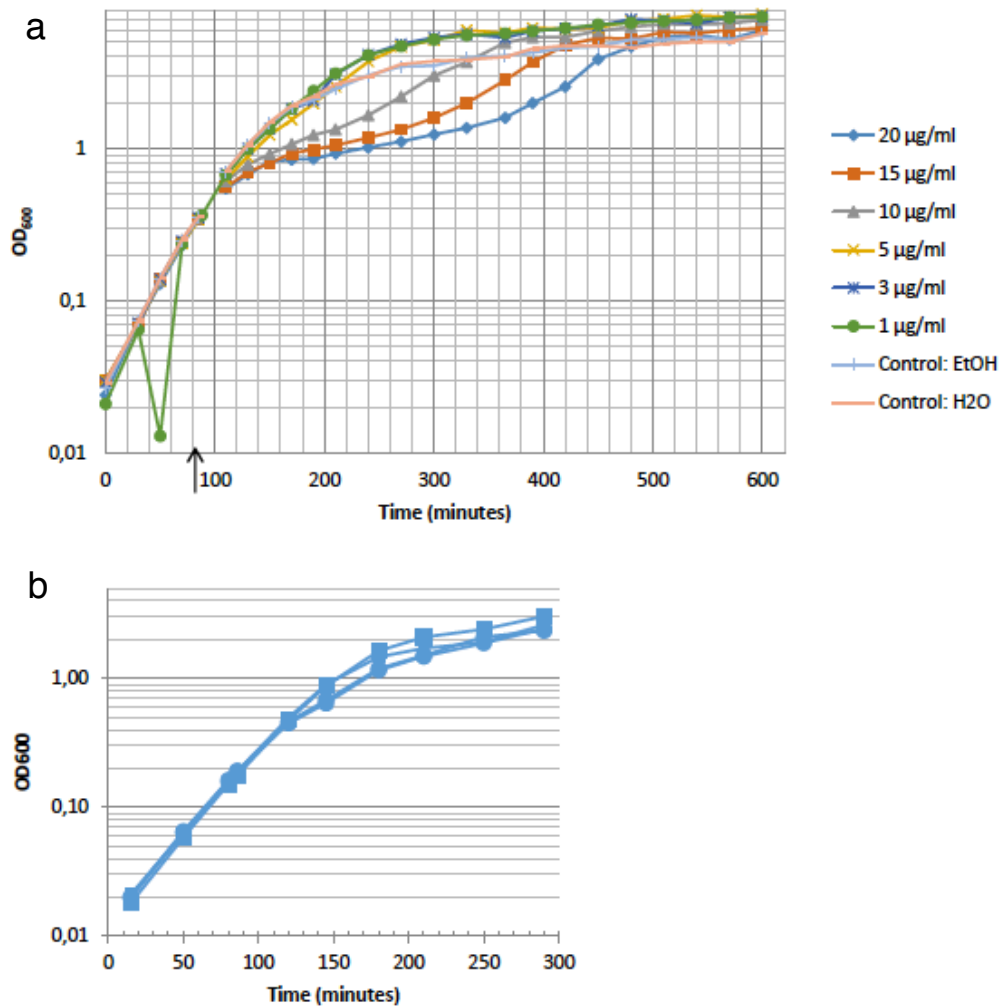

**Figure S7.** Growth of *S. aureus* 8325-4 with and without ajoene. **a)** Growth of *S. aureus* 8325-4 in the presence of increasing concentrations of ajoene. Ajoene is added at 90 minutes at an OD<sub>600</sub> of 0.4 as indicated by the arrow. **b)** Growth of *S. aureus* 8325-4 in the presence of 5 µg/ml ajoene. Squares represent cultures treated with DMSO, circles represent cultures treated with 5 µg/ml ajoene.

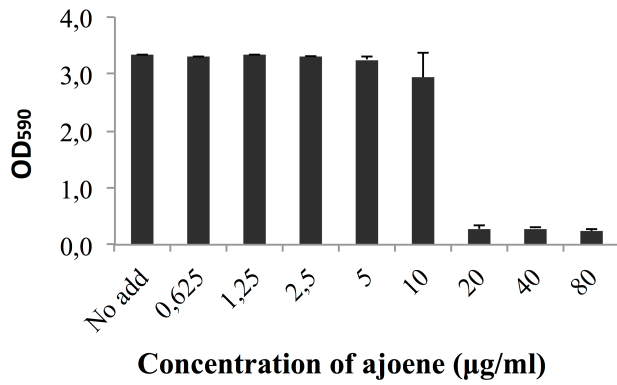

**Figure S8.** Production of static biofilm by *S. aureus* 8325-4 without and with ajoene supplemented growth medium in two-fold dilution from 80 to 0.625 µg/ml. There was no difference in biofilm formation with non-growth inhibitory concentrations of ajoene. The experiments were done in triplicate. No add: No addition of ajoene. Error bars are means ± SDs.

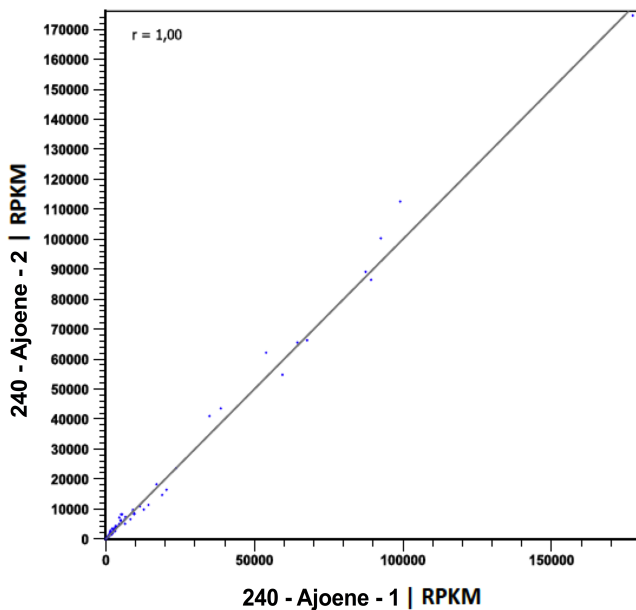

**Figure S9.** Scatter plot showing a comparison of RPKM (Reads Per Kilobase transcript per Million reads) between the replicate samples of ajoene at 240 minutes.

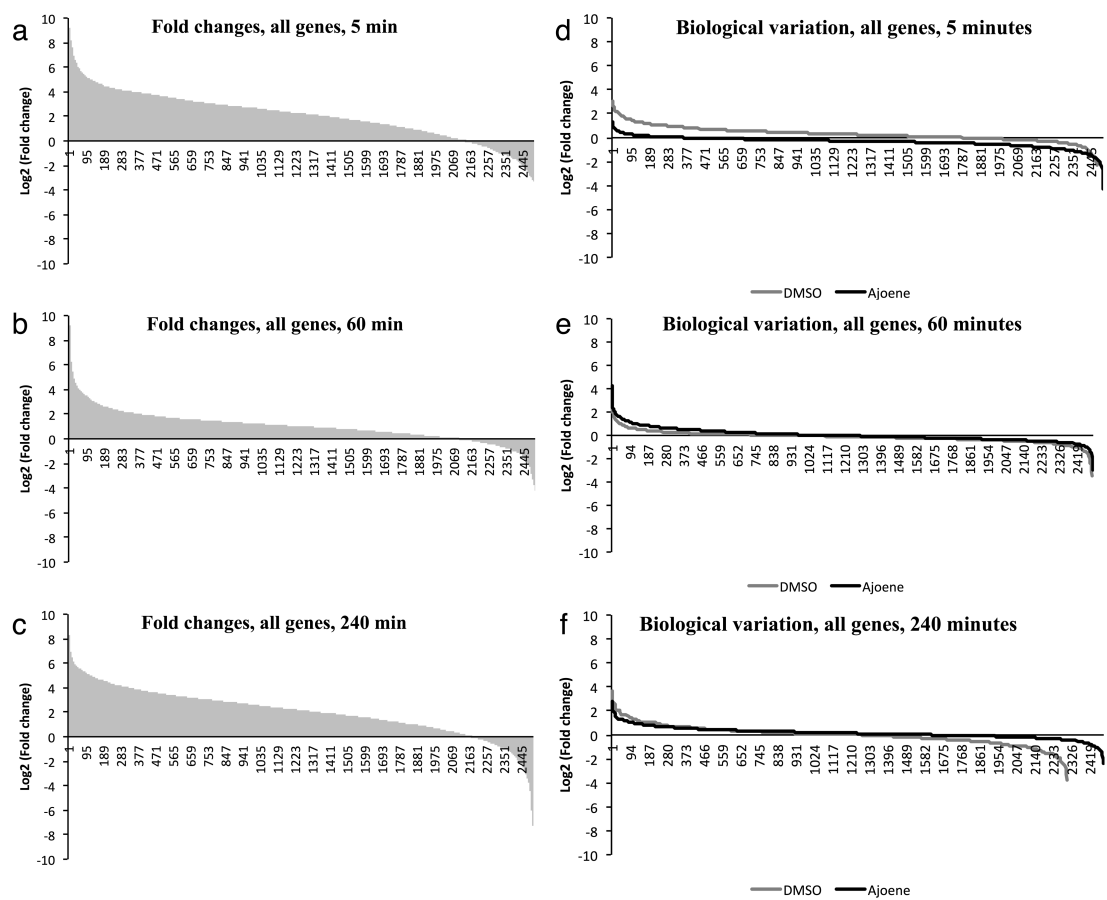

**Figure S10.** Global characteristics of the RNA sequencing data set. **a-c)** Global fold changes at 5', 60' and 240' minutes sorted by magnitude. **d-f)** The variation between biological replicates at 5', 60' and 240' minutes. On all charts, the Y-axis shows the log base 2 of the fold change.



## Supplementary tables

**Table S1** Transcript level and calculated fold change. Addition of 5 µg/ml ajoene at each of the three time points, 5', 60' and 240' minutes.

| Gene                                         | Locus tag<br>(SAOUHSC_) | RPKM 5<br>min<br>untreated | RPKM 5<br>min<br>Ajoene | RPKM 60<br>min<br>untreated | RPKM 60<br>min<br>Ajoene | RPKM<br>240 min<br>untreated | RPKM<br>240 min<br>Ajoene | Fold<br>change 5<br>min | Fold<br>change 60<br>min | Fold<br>change<br>240 min |
|----------------------------------------------|-------------------------|----------------------------|-------------------------|-----------------------------|--------------------------|------------------------------|---------------------------|-------------------------|--------------------------|---------------------------|
| <b>Selected virulence indicators</b>         |                         |                            |                         |                             |                          |                              |                           |                         |                          |                           |
| RNAIII                                       | 02260                   | 14,30                      | 21,75                   | 69,00                       | 5,42                     | 4517,58                      | 67,16                     | 1,521                   | 0,079                    | 0,015                     |
| hla                                          | 01121                   | 3,00                       | 13,61                   | 5,10                        | 3,23                     | 1259,99                      | 12,75                     | 4,531                   | 0,634                    | 0,010                     |
| spa                                          | 00069                   | 113,97                     | 369,07                  | 210,60                      | 217,95                   | 95,94                        | 462,89                    | 3,238                   | 1,035                    | 4,825                     |
| <b>The agr operon</b>                        |                         |                            |                         |                             |                          |                              |                           |                         |                          |                           |
| agrA                                         | 02265                   | 27,36                      | 65,77                   | 36,73                       | 34,87                    | 147,14                       | 88,52                     | 2,404                   | 0,949                    | 0,602                     |
| agrB                                         | 02261                   | 11,50                      | 84,75                   | 46,46                       | 28,09                    | 84,26                        | 41,19                     | 7,367                   | 0,605                    | 0,489                     |
| agrC                                         | 02264                   | 8,51                       | 43,22                   | 20,58                       | 16,70                    | 57,81                        | 26,71                     | 5,081                   | 0,811                    | 0,462                     |
| agrD                                         | 02262                   | 4,13                       | 14,81                   | 13,61                       | 10,29                    | 18,37                        | 10,81                     | 3,584                   | 0,756                    | 0,588                     |
| <b>Other pleiotropic response regulators</b> |                         |                            |                         |                             |                          |                              |                           |                         |                          |                           |
| rot                                          | 01879                   | 5,99                       | 16,27                   | 7,64                        | 5,16                     | 9,83                         | 7,86                      | 2,718                   | 0,676                    | 0,800                     |
| codY                                         | 01228                   | 101,12                     | 138,27                  | 72,65                       | 152,69                   | 86,86                        | 62,24                     | 1,367                   | 2,102                    | 0,717                     |
| sarA                                         | 00620                   | 49,61                      | 590,16                  | 28,40                       | 130,61                   | 1,02                         | 10,52                     | 11,896                  | 4,599                    | 10,310                    |
| saeS                                         | 00714                   | 19,32                      | 59,65                   | 25,35                       | 48,55                    | 15,43                        | 36,61                     | 3,088                   | 1,915                    | 2,372                     |
| saeR                                         | 00715                   | 13,48                      | 85,61                   | 33,67                       | 47,35                    | 13,06                        | 32,49                     | 6,351                   | 1,406                    | 2,488                     |
| sarS                                         | 00070                   | 34,28                      | 36,89                   | 33,53                       | 40,53                    | 2,05                         | 311,12                    | 1,076                   | 1,209                    | 152,112                   |
| sarR                                         | 02566                   | 3,88                       | 11,16                   | 4,96                        | 2,67                     | 0,55                         | 4,95                      | 2,877                   | 0,539                    | 9,077                     |
| ccpA                                         | 01850                   | 141,45                     | 211,85                  | 147,03                      | 113,30                   | 41,34                        | 135,34                    | 1,498                   | 0,771                    | 3,274                     |
| σB                                           | 02298                   | 78,12                      | 179,54                  | 61,23                       | 146,68                   | 11,51                        | 59,09                     | 2,298                   | 2,396                    | 5,134                     |
| <b>Proteases and lipases</b>                 |                         |                            |                         |                             |                          |                              |                           |                         |                          |                           |
| V8 protease                                  | 00988                   | 4,47                       | 36,85                   | 6,83                        | 13,15                    | 2273,96                      | 9,73                      | 8,248                   | 1,925                    | 0,004                     |
| splB                                         | 01941                   | 0,53                       | 10,40                   | 1,33                        | 0,99                     | 226,91                       | 0,98                      | 19,524                  | 0,748                    | 0,004                     |
| splF                                         | 01935                   | 1,47                       | 7,26                    | 2,53                        | 2,00                     | 346,23                       | 2,24                      | 4,944                   | 0,789                    | 0,006                     |
| splA                                         | 01942                   | 1,08                       | 9,16                    | 0,41                        | 1,17                     | 190,61                       | 1,45                      | 8,477                   | 2,876                    | 0,008                     |
| splE                                         | 01936                   | 1,07                       | 14,99                   | 2,01                        | 3,60                     | 378,23                       | 3,68                      | 14,051                  | 1,795                    | 0,010                     |
| sspB                                         | 00987                   | 6,94                       | 10,92                   | 5,85                        | 9,42                     | 1341,02                      | 13,68                     | 1,575                   | 1,611                    | 0,010                     |
| splD                                         | 01938                   | 0,53                       | 9,28                    | 0,93                        | 2,88                     | 233,58                       | 2,69                      | 17,362                  | 3,089                    | 0,011                     |
| splC                                         | 01939                   | 0,81                       | 12,80                   | 0,80                        | 2,31                     | 199,37                       | 2,55                      | 15,755                  | 2,893                    | 0,013                     |
| sspC                                         | 00986                   | 4,96                       | 10,59                   | 7,56                        | 8,18                     | 945,81                       | 14,49                     | 2,135                   | 1,082                    | 0,015                     |
| Aureolysin                                   | 02971                   | 13,27                      | 62,54                   | 21,15                       | 19,26                    | 54,79                        | 7,29                      | 4,713                   | 0,910                    | 0,133                     |
| Lipase                                       | 03006                   | 1,14                       | 20,10                   | 2,21                        | 7,78                     | 216,83                       | 4,85                      | 17,676                  | 3,525                    | 0,022                     |
| Lipase                                       | 00300                   | 18,88                      | 54,14                   | 24,48                       | 16,46                    | 120,62                       | 25,07                     | 2,867                   | 0,672                    | 0,208                     |

**Table S1 continued**

| Gene                                                   | Locus tag<br>(SAOUHSC_) | RPKM 5<br>min<br>untreated | RPKM 5<br>min<br>Ajoene | RPKM 60<br>min<br>untreated | RPKM 60<br>min<br>Ajoene | RPKM<br>240 min<br>untreated | RPKM<br>240 min<br>Ajoene | Fold<br>change 5<br>min | Fold<br>change 60<br>min | Fold<br>change<br>240 min |
|--------------------------------------------------------|-------------------------|----------------------------|-------------------------|-----------------------------|--------------------------|------------------------------|---------------------------|-------------------------|--------------------------|---------------------------|
| <b>Autolysins</b>                                      |                         |                            |                         |                             |                          |                              |                           |                         |                          |                           |
| sle1                                                   | 00427                   | 48,55                      | 328,72                  | 87,91                       | 521,06                   | 3,44                         | 79,56                     | 6,771                   | 5,927                    | 23,149                    |
| atl                                                    | 00994                   | 23,25                      | 267,60                  | 48,50                       | 185,34                   | 3,45                         | 44,57                     | 11,510                  | 3,822                    | 12,907                    |
| <b>Autolysis regulators</b>                            |                         |                            |                         |                             |                          |                              |                           |                         |                          |                           |
| cidC                                                   | 02849                   | 44,53                      | 219,78                  | 41,09                       | 104,07                   | 0,56                         | 53,76                     | 4,936                   | 2,533                    | 95,782                    |
| cidB                                                   | 02850                   | 36,67                      | 367,61                  | 61,47                       | 218,67                   | 0,55                         | 68,42                     | 10,026                  | 3,558                    | 124,323                   |
| cidA                                                   | 02851                   | 22,14                      | 226,68                  | 58,17                       | 139,31                   | 0,00                         | 43,70                     | 10,241                  | 2,395                    | -                         |
| cidR                                                   | 02852                   | 50,16                      | 101,91                  | 39,85                       | 62,98                    | 1,86                         | 48,77                     | 2,031                   | 1,580                    | 26,219                    |
| lrgA                                                   | 00232                   | 0,86                       | 6,44                    | 2,16                        | 0,92                     | 2,15                         | 2,76                      | 7,474                   | 0,427                    | 1,285                     |
| lrgB                                                   | 00233                   | 0,56                       | 8,27                    | 1,09                        | 2,64                     | 32,99                        | 0,86                      | 14,886                  | 2,413                    | 0,026                     |
| <b>Phenol soluble modulins</b>                         |                         |                            |                         |                             |                          |                              |                           |                         |                          |                           |
| PSM-alpha                                              | 00411                   | 2,96                       | 79,97                   | 3,72                        | 20,74                    | 0,76                         | 0,00                      | 26,976                  | 5,574                    | 0,000                     |
| PSM-beta-1                                             | 01035                   | 38,19                      | 247,13                  | 50,63                       | 126,03                   | 4,82                         | 26,87                     | 6,471                   | 2,489                    | 5,576                     |
| PSM-beta-2                                             | 01036                   | 29,60                      | 408,70                  | 69,65                       | 249,14                   | 2,21                         | 37,46                     | 13,807                  | 3,577                    | 16,958                    |
| <b>Other cell-surface-associated proteins</b>          |                         |                            |                         |                             |                          |                              |                           |                         |                          |                           |
| clfA                                                   | 00812                   | 7917,65                    | 5043,54                 | 5961,16                     | 14839,22                 | 18235,83                     | 17649,61                  | 0,637                   | 2,489                    | 0,968                     |
| clfB                                                   | 02963                   | 35,69                      | 913,28                  | 40,58                       | 484,48                   | 2,80                         | 129,83                    | 25,587                  | 11,939                   | 46,341                    |
| coa                                                    | 00192                   | 7,95                       | 21,80                   | 7,28                        | 12,04                    | 3,84                         | 12,44                     | 2,742                   | 1,653                    | 3,238                     |
| fnbA                                                   | 01175                   | 32,08                      | 190,36                  | 32,66                       | 94,02                    | 5,00                         | 24,48                     | 5,934                   | 2,878                    | 4,898                     |
| fnbB                                                   | 02802                   | 4,20                       | 359,73                  | 6,62                        | 82,82                    | 0,81                         | 13,14                     | 85,705                  | 12,512                   | 16,263                    |
| icaA                                                   | 03002                   | 10,84                      | 116,50                  | 38,96                       | 21,91                    | 0,31                         | 1,24                      | 10,745                  | 0,562                    | 3,977                     |
| icaB                                                   | 03004                   | 21,24                      | 62,42                   | 25,50                       | 22,99                    | 4,44                         | 22,70                     | 2,939                   | 0,902                    | 5,117                     |
| icaC                                                   | 03005                   | 16,75                      | 23,30                   | 16,40                       | 22,17                    | 1,28                         | 27,88                     | 1,391                   | 1,352                    | 21,789                    |
| <b>Regulators of cell envelope turnover and charge</b> |                         |                            |                         |                             |                          |                              |                           |                         |                          |                           |
| tagO                                                   | 00762                   | 5,39                       | 49,43                   | 8,81                        | 21,48                    | 0,81                         | 5,09                      | 9,173                   | 2,437                    | 6,241                     |
| vraF                                                   | 00667                   | 13,38                      | 91,06                   | 24,68                       | 42,83                    | 6,46                         | 24,91                     | 6,805                   | 1,735                    | 3,855                     |
| vraG                                                   | 00668                   | 21,66                      | 46,04                   | 18,18                       | 35,77                    | 3,16                         | 23,85                     | 2,125                   | 1,968                    | 7,542                     |
| yycF/walR                                              | 00020                   | 25,90                      | 346,78                  | 62,74                       | 155,52                   | 13,71                        | 35,40                     | 13,390                  | 2,479                    | 2,582                     |
| yycG/walK                                              | 00021                   | 13,93                      | 180,88                  | 33,50                       | 84,29                    | 3,97                         | 14,74                     | 12,985                  | 2,516                    | 3,715                     |
| graR                                                   | 00665                   | 4,71                       | 59,01                   | 10,38                       | 33,39                    | 4,43                         | 9,28                      | 12,527                  | 3,217                    | 2,097                     |
| graS                                                   | 00666                   | 21,21                      | 79,16                   | 24,71                       | 63,83                    | 10,00                        | 32,66                     | 3,732                   | 2,583                    | 3,266                     |
| graX                                                   | 00664                   | 10,75                      | 222,75                  | 25,86                       | 104,96                   | 6,05                         | 21,09                     | 20,723                  | 4,059                    | 3,487                     |
| mprF                                                   | 01359                   | 11,92                      | 30,04                   | 13,28                       | 19,98                    | 8,75                         | 24,83                     | 2,519                   | 1,505                    | 2,838                     |

**Table S1 continued**

| Gene                                               | Locus tag<br>(SAOUHSC_) | RPKM 5<br>min<br>untreated | RPKM 5<br>min<br>Ajoene | RPKM 60<br>min<br>untreated | RPKM 60<br>min<br>Ajoene | RPKM<br>240 min<br>untreated | RPKM<br>240 min<br>Ajoene | Fold<br>change 5<br>min | Fold<br>change 60<br>min | Fold<br>change<br>240 min |
|----------------------------------------------------|-------------------------|----------------------------|-------------------------|-----------------------------|--------------------------|------------------------------|---------------------------|-------------------------|--------------------------|---------------------------|
| <b>The dlt operon</b>                              |                         |                            |                         |                             |                          |                              |                           |                         |                          |                           |
| dltX                                               | 00868                   | 1929,50                    | 1851,31                 | 1801,10                     | 3430,62                  | 20,73                        | 5411,17                   | 0,959                   | 1,905                    | 261,048                   |
| dltA                                               | 00869                   | 2030,94                    | 2339,79                 | 2100,05                     | 3403,94                  | 15,02                        | 4763,44                   | 1,152                   | 1,621                    | 317,150                   |
| dltB                                               | 00870                   | 392,31                     | 358,80                  | 291,63                      | 607,16                   | 3,64                         | 615,25                    | 0,915                   | 2,082                    | 169,182                   |
| dltC                                               | 00871                   | 422,38                     | 411,20                  | 295,62                      | 714,86                   | 6,91                         | 599,78                    | 0,974                   | 2,418                    | 86,776                    |
| dltD                                               | 00872                   | 460,33                     | 626,15                  | 336,18                      | 915,43                   | 14,10                        | 728,14                    | 1,360                   | 2,723                    | 51,636                    |
| <b>SaPI3</b>                                       |                         |                            |                         |                             |                          |                              |                           |                         |                          |                           |
| -                                                  | 01935                   | 1,47                       | 7,26                    | 2,53                        | 2,00                     | 346,23                       | 2,24                      | 4,944                   | 0,789                    | 0,006                     |
| -                                                  | 01936                   | 1,07                       | 14,99                   | 2,01                        | 3,60                     | 378,23                       | 3,68                      | 14,051                  | 1,795                    | 0,010                     |
| -                                                  | 01938                   | 0,53                       | 9,28                    | 0,93                        | 2,88                     | 233,58                       | 2,69                      | 17,362                  | 3,089                    | 0,011                     |
| -                                                  | 01939                   | 0,81                       | 12,80                   | 0,80                        | 2,31                     | 199,37                       | 2,55                      | 15,755                  | 2,893                    | 0,013                     |
| -                                                  | 01941                   | 0,53                       | 10,40                   | 1,33                        | 0,99                     | 226,91                       | 0,98                      | 19,524                  | 0,748                    | 0,004                     |
| -                                                  | 01942                   | 1,08                       | 9,16                    | 0,41                        | 1,17                     | 190,61                       | 1,45                      | 8,477                   | 2,876                    | 0,008                     |
| -                                                  | 01944                   | 2,74                       | 47,13                   | 3,22                        | 6,40                     | 2177,84                      | 4,09                      | 17,183                  | 1,990                    | 0,002                     |
| <b>Selected secreted toxins</b>                    |                         |                            |                         |                             |                          |                              |                           |                         |                          |                           |
| lukD                                               | 01954                   | 0,39                       | 4,44                    | 0,39                        | 0,73                     | 1,18                         | 1,15                      | 11,268                  | 1,880                    | 0,972                     |
| lukE                                               | 01955                   | 1,59                       | 6,52                    | 1,38                        | 1,02                     | 1,72                         | 4,59                      | 4,093                   | 0,742                    | 2,673                     |
| ear                                                | 01944                   | 2,74                       | 47,13                   | 3,22                        | 6,40                     | 2177,84                      | 4,09                      | 17,183                  | 1,990                    | 0,002                     |
| eta (exfoliative<br>toxin A)                       | 01133                   | 26,33                      | 180,54                  | 26,42                       | 69,81                    | 13,77                        | 43,03                     | 6,857                   | 2,643                    | 3,124                     |
| <b>All proteins containing enterotoxin domains</b> |                         |                            |                         |                             |                          |                              |                           |                         |                          |                           |
| SAOUHSC_00354                                      | 00354                   | 0,64                       | 4,20                    | 0,78                        | 2,20                     | 0,16                         | 1,33                      | 6,597                   | 2,810                    | 8,569                     |
| SAOUHSC_00383                                      | 00383                   | 0,85                       | 5,99                    | 1,27                        | 3,50                     | 0,28                         | 1,03                      | 7,032                   | 2,761                    | 3,702                     |
| SAOUHSC_00384                                      | 00384                   | 0,69                       | 4,80                    | 0,97                        | 2,08                     | 0,14                         | 0,43                      | 7,004                   | 2,154                    | 3,060                     |
| SAOUHSC_00386                                      | 00386                   | 5,38                       | 12,73                   | 4,75                        | 9,41                     | 3,25                         | 8,19                      | 2,366                   | 1,980                    | 2,523                     |
| SAOUHSC_00389                                      | 00389                   | 1,87                       | 5,22                    | 1,86                        | 3,68                     | 0,31                         | 2,75                      | 2,799                   | 1,975                    | 8,958                     |
| SAOUHSC_00390                                      | 00390                   | 2,73                       | 1,35                    | 1,91                        | 2,34                     | 0,13                         | 1,00                      | 0,493                   | 1,227                    | 7,442                     |
| SAOUHSC_00391                                      | 00391                   | 34,12                      | 18,11                   | 35,71                       | 29,55                    | 19,26                        | 41,48                     | 0,531                   | 0,828                    | 2,153                     |
| SAOUHSC_00392                                      | 00392                   | 2,62                       | 2,87                    | 2,21                        | 2,67                     | 2,90                         | 3,20                      | 1,096                   | 1,208                    | 1,104                     |
| SAOUHSC_00393                                      | 00393                   | 2,34                       | 1,36                    | 2,20                        | 3,10                     | 1,52                         | 1,75                      | 0,581                   | 1,412                    | 1,149                     |
| SAOUHSC_00394                                      | 00394                   | 2,90                       | 5,05                    | 2,06                        | 6,23                     | 0,55                         | 2,47                      | 1,742                   | 3,028                    | 4,477                     |
| SAOUHSC_00395                                      | 00395                   | 25,28                      | 20,95                   | 19,93                       | 26,93                    | 44,16                        | 22,97                     | 0,829                   | 1,351                    | 0,520                     |
| SAOUHSC_00399                                      | 00399                   | 3,99                       | 3,78                    | 3,26                        | 1,53                     | 1,71                         | 2,40                      | 0,947                   | 0,469                    | 1,402                     |
| SAOUHSC_01127                                      | 01127                   | 0,13                       | 11,52                   | 1,19                        | 1,99                     | 0,13                         | 1,39                      | 85,766                  | 1,677                    | 10,272                    |
| Enterotoxin type A                                 | 01705                   | 2,73                       | 22,23                   | 6,26                        | 15,96                    | 0,42                         | 3,17                      | 8,141                   | 2,550                    | 7,613                     |

**Table S1** continued

| Gene                            | Locus tag<br>(SAOUHSC_) | RPKM 5<br>min<br>untreated | RPKM 5<br>min<br>Ajoene | RPKM 60<br>min<br>untreated | RPKM 60<br>min<br>Ajoene | RPKM<br>240 min<br>untreated | RPKM<br>240 min<br>Ajoene | Fold<br>change 5<br>min | Fold<br>change 60<br>min | Fold<br>change<br>240 min |
|---------------------------------|-------------------------|----------------------------|-------------------------|-----------------------------|--------------------------|------------------------------|---------------------------|-------------------------|--------------------------|---------------------------|
| <b>Hemolysins</b>               |                         |                            |                         |                             |                          |                              |                           |                         |                          |                           |
| alpha-hemolysin                 | 01121                   | 3,00                       | 13,61                   | 5,10                        | 3,23                     | 1259,99                      | 12,75                     | 4,531                   | 0,634                    | 0,010                     |
| beta-hemolysin                  | 02240                   | 20,25                      | 31,76                   | 27,92                       | 23,20                    | 1634,76                      | 186,08                    | 1,569                   | 0,831                    | 0,114                     |
| RNAIII / delta-hemolysin        | 02260                   | 14,30                      | 21,75                   | 69,00                       | 5,42                     | 4517,58                      | 67,16                     | 1,521                   | 0,079                    | 0,015                     |
| gamma-hemolysin                 | 02708                   | 1,14                       | 5,22                    | 1,34                        | 1,89                     | 12,99                        | 1,87                      | 4,573                   | 1,412                    | 0,144                     |
| <b>ESAT-6 secretion pathway</b> |                         |                            |                         |                             |                          |                              |                           |                         |                          |                           |
| esxA                            | 00257                   | 563,71                     | 196,08                  | 906,55                      | 21,72                    | 1100,77                      | 811,64                    | 0,348                   | 0,024                    | 0,737                     |
| esaA                            | 00258                   | 1084,92                    | 133,70                  | 1399,54                     | 60,21                    | 1461,88                      | 1485,86                   | 0,123                   | 0,043                    | 1,016                     |
| essA                            | 00259                   | 3955,79                    | 458,41                  | 4740,56                     | 251,79                   | 6579,47                      | 5517,42                   | 0,116                   | 0,053                    | 0,839                     |
| esaB                            | 00260                   | 2473,28                    | 206,20                  | 2782,98                     | 118,49                   | 3536,46                      | 3030,31                   | 0,083                   | 0,043                    | 0,857                     |
| essB                            | 00261                   | 4750,25                    | 468,34                  | 5337,11                     | 342,39                   | 9010,11                      | 5662,48                   | 0,099                   | 0,064                    | 0,628                     |
| essC                            | 00262                   | 3324,96                    | 415,61                  | 3984,19                     | 223,36                   | 4279,58                      | 3767,99                   | 0,125                   | 0,056                    | 0,880                     |
| esaC                            | 00264                   | 1345,00                    | 258,95                  | 1615,64                     | 102,36                   | 1003,80                      | 1281,91                   | 0,193                   | 0,063                    | 1,277                     |
| esxB                            | 00265                   | 847,94                     | 159,40                  | 1018,56                     | 44,74                    | 610,87                       | 679,18                    | 0,188                   | 0,044                    | 1,112                     |
| esaE                            | 00266                   | 889,51                     | 154,50                  | 1032,39                     | 68,06                    | 623,49                       | 840,03                    | 0,174                   | 0,066                    | 1,347                     |
| esaF                            | 00267                   | 583,73                     | 129,68                  | 713,33                      | 46,51                    | 475,10                       | 464,19                    | 0,222                   | 0,065                    | 0,977                     |
| esaD                            | 00268                   | 700,83                     | 210,58                  | 827,04                      | 73,28                    | 622,67                       | 553,39                    | 0,300                   | 0,089                    | 0,889                     |
| <b>The ure operon</b>           |                         |                            |                         |                             |                          |                              |                           |                         |                          |                           |
| Putative urea transporter       | 02557                   | 1,19                       | 24,38                   | 1,62                        | 12,86                    | 0,43                         | 7,21                      | 20,497                  | 7,963                    | 16,648                    |
| ureA                            | 02558                   | 1,28                       | 264,62                  | 0,63                        | 120,11                   | 3,18                         | 17,39                     | 206,895                 | 189,956                  | 5,464                     |
| ureB                            | 02559                   | 2,57                       | 474,34                  | 3,27                        | 197,79                   | 9,16                         | 42,63                     | 184,374                 | 60,473                   | 4,656                     |
| ureC                            | 02561                   | 1,35                       | 278,71                  | 2,24                        | 98,36                    | 0,61                         | 18,50                     | 206,601                 | 43,965                   | 30,145                    |
| ureE                            | 02562                   | 1,50                       | 162,61                  | 1,91                        | 62,43                    | 0,85                         | 16,96                     | 108,717                 | 32,732                   | 19,913                    |
| ureF                            | 02563                   | 1,40                       | 93,98                   | 2,22                        | 34,82                    | 0,99                         | 10,58                     | 67,196                  | 15,658                   | 10,694                    |
| ureG                            | 02564                   | 2,85                       | 128,95                  | 8,74                        | 53,20                    | 1,42                         | 24,94                     | 45,308                  | 6,089                    | 17,519                    |
| ureD                            | 02565                   | 4,02                       | 62,44                   | 6,07                        | 36,82                    | 1,04                         | 18,53                     | 15,532                  | 6,061                    | 17,776                    |
| <b>TCA cycle enzymes</b>        |                         |                            |                         |                             |                          |                              |                           |                         |                          |                           |
| sucB                            | 01416                   | 250,73                     | 113,83                  | 352,01                      | 243,55                   | 8818,40                      | 357,92                    | 0,454                   | 0,692                    | 0,041                     |
| sucA                            | 01418                   | 93,96                      | 72,04                   | 147,73                      | 73,05                    | 3591,61                      | 117,74                    | 0,767                   | 0,495                    | 0,033                     |
| SAOUHSC_01614                   | 01614                   | 19,15                      | 147,74                  | 34,96                       | 103,57                   | 5,28                         | 22,51                     | 7,715                   | 2,963                    | 4,264                     |
| SAOUHSC_01043                   | 01043                   | 96,37                      | 111,20                  | 73,18                       | 115,27                   | 41,25                        | 108,37                    | 1,154                   | 1,575                    | 2,627                     |
| SAOUHSC_01266                   | 01266                   | 27,59                      | 120,09                  | 25,77                       | 49,89                    | 1,37                         | 15,73                     | 4,352                   | 1,936                    | 11,454                    |
| SAOUHSC_01267                   | 01267                   | 36,30                      | 88,35                   | 29,43                       | 48,18                    | 1,67                         | 16,43                     | 2,434                   | 1,637                    | 9,836                     |
| SAOUHSC_01802                   | 01802                   | 11,48                      | 134,13                  | 23,70                       | 61,53                    | 30,16                        | 8,78                      | 11,686                  | 2,596                    | 0,291                     |
| SAOUHSC_01347                   | 01347                   | 11,44                      | 56,94                   | 15,49                       | 31,58                    | 13,77                        | 7,78                      | 4,977                   | 2,038                    | 0,565                     |
| SAOUHSC_01801                   | 01801                   | 11,60                      | 46,61                   | 13,61                       | 26,44                    | 21,42                        | 9,20                      | 4,019                   | 1,942                    | 0,430                     |
| sucC                            | 01216                   | 24,77                      | 135,40                  | 45,39                       | 75,17                    | 29,09                        | 19,44                     | 5,467                   | 1,656                    | 0,668                     |
| SAOUHSC_01218                   | 01218                   | 19,48                      | 65,02                   | 25,96                       | 37,97                    | 27,24                        | 13,50                     | 3,339                   | 1,462                    | 0,496                     |
| SAOUHSC_01103                   | 01103                   | 6,87                       | 43,77                   | 16,39                       | 10,26                    | 7,85                         | 3,99                      | 6,368                   | 0,626                    | 0,509                     |
| sdhA                            | 01104                   | 12,45                      | 76,77                   | 26,44                       | 19,64                    | 25,07                        | 9,82                      | 6,166                   | 0,743                    | 0,392                     |

**Table S2: Strains, plasmids and primers used in this study.**

| Strain, plasmid and primer          | Characteristics and sequence (5'→3')                                                                                           | Reference                                                                            |
|-------------------------------------|--------------------------------------------------------------------------------------------------------------------------------|--------------------------------------------------------------------------------------|
| <b><i>S. aureus</i> strains</b>     |                                                                                                                                |                                                                                      |
| 8325-4                              | Wild-type <i>S. aureus</i>                                                                                                     | 1                                                                                    |
| RC203                               | <i>spa::lacZ</i> , Erm <sup>R</sup>                                                                                            | 2                                                                                    |
| SH101F7                             | <i>RNAlII::lacZ</i> , Erm <sup>R</sup>                                                                                         | 3                                                                                    |
| <b><i>P. aeruginosa</i> strains</b> |                                                                                                                                |                                                                                      |
| PAO1                                | Wild-type <i>P. aeruginosa</i>                                                                                                 | <a href="http://www.pseudomonas.med.ecu.edu">www.pseudomonas.med.ecu.edu</a> PAO0001 |
| $\Delta rsmYZ$                      | <i>rsmYZ</i> mutant                                                                                                            | 4                                                                                    |
| $\Delta rsmY$                       | <i>rsmY</i> mutant                                                                                                             | 4                                                                                    |
| $\Delta rsmZ$                       | <i>rsmZ</i> mutant                                                                                                             | 5                                                                                    |
| $\Delta gacA$                       | <i>gacA::\Omega</i> -Sm/Sp; Sm/Sp <sup>f</sup>                                                                                 | 6                                                                                    |
| $\Delta rsmA$                       | <i>rsmA</i> mutant                                                                                                             | 7                                                                                    |
| $\Delta retS$                       | <i>retS</i> mutant                                                                                                             | This study                                                                           |
| <i>lasB-gfp</i>                     | <i>lasB-gfp</i> (ASV) translational fusion, Ap <sup>R</sup> Gm <sup>R</sup>                                                    | 8                                                                                    |
| PAO098                              | <i>rsmZ-gfpmut3*</i> transcriptional fusion, Gm <sup>R</sup> , Ap <sup>R</sup>                                                 | This study                                                                           |
| PAO099                              | <i>rsmY-gfpmut3*</i> transcriptional fusion, Gm <sup>R</sup> , Ap <sup>R</sup>                                                 | This study                                                                           |
| PAO101                              | $\Delta rsmYZ$ , <i>lasB-gfp</i> (ASV), Ap <sup>R</sup> Gm <sup>R</sup>                                                        | This study                                                                           |
| PAO102                              | $\Delta rsmY$ , <i>lasB-gfp</i> (ASV), Ap <sup>R</sup> Gm <sup>R</sup>                                                         | This study                                                                           |
| PAO103                              | $\Delta rsmZ$ , <i>lasB-gfp</i> (ASV), Ap <sup>R</sup> Gm <sup>R</sup>                                                         | This study                                                                           |
| PAO104                              | $\Delta rsmA$ , <i>lasB-gfp</i> (ASV), Ap <sup>R</sup> Gm <sup>R</sup>                                                         | This study                                                                           |
| PAO105                              | $\Delta gacA$ , <i>lasB-gfp</i> (ASV), Ap <sup>R</sup> Gm <sup>R</sup>                                                         | This study                                                                           |
| PAO106                              | $\Delta retS$ , <i>rsmZ-gfpmut3*</i> , Gm <sup>R</sup> , Ap <sup>R</sup>                                                       | This study                                                                           |
| PAO107                              | $\Delta retS$ , <i>rsmY-gfpmut3*</i> , Gm <sup>R</sup> , Ap <sup>R</sup>                                                       | This study                                                                           |
| <b>Plasmids</b>                     |                                                                                                                                |                                                                                      |
| pMHLAS                              | pMH391 carrying <i>PlasB-gfp</i> (ASV), Ap <sup>R</sup> Gm <sup>R</sup>                                                        | 8                                                                                    |
| pMHRA                               | pMH391 carrying <i>PrhIA-gfp</i> (ASV), Ap <sup>R</sup> Gm <sup>R</sup>                                                        | 9                                                                                    |
| pMP220 <i>rsmZ-lacZ</i>             | pMP220 carrying a <i>rsmZ-lacZ</i> transcriptional fusion, Tc <sup>R</sup>                                                     | 10                                                                                   |
| pMP220 <i>rsmY-lacZ</i>             | pMP220 carrying a <i>rsmY-lacZ</i> transcriptional fusion, Tc <sup>R</sup>                                                     | 10                                                                                   |
| pMH305                              | Broad-host-range vector, pUCP22Not-RBSII- <i>gfp</i> (Mut3)-T <sub>0</sub> -T <sub>1</sub> , Gm <sup>R</sup> , Ap <sup>R</sup> | 11                                                                                   |
| pJBA25                              | pUC18Not-RBSII- <i>gfpmut3*</i> -T <sub>0</sub> -T <sub>1</sub> , Ap <sup>R</sup>                                              | 12                                                                                   |
| pDONR221                            | Gateway donor vector, Kan <sup>R</sup> Cam <sup>R</sup>                                                                        | Invitrogen                                                                           |
| pEX18ApGW                           | Gateway compatible gene replacement vector, Amp <sup>R</sup> Cam <sup>R</sup>                                                  | 13                                                                                   |
| pPS856                              | Source of the FRT-flanked gentamicin resistance cassette, Amp <sup>R</sup>                                                     | 14                                                                                   |

|                             |                                                                                                |            |
|-----------------------------|------------------------------------------------------------------------------------------------|------------|
|                             | Gm <sup>R</sup>                                                                                |            |
| pFLP2                       | Flp recombinase expression vector                                                              | 14         |
| pΔretS                      | retS deletion vector, Amp <sup>R</sup> Gm <sup>R</sup>                                         | This study |
| pRV59_1                     | pMH305 carrying <i>rsmZ-gfpmut3*</i> transcriptional fusion, Gm <sup>R</sup> , Ap <sup>R</sup> | This study |
| pRV60_1                     | pMH305 carrying <i>rsmY-gfpmut3*</i> transcriptional fusion, Gm <sup>R</sup> , Ap <sup>R</sup> | This study |
| <b>Primers</b>              |                                                                                                |            |
| rsmY forward <sup>a</sup>   | GCGCCAAAGACAATACGGAA                                                                           | This study |
| rsmY reverse <sup>a</sup>   | CTCTATCCTGACATCCGTGCT                                                                          | This study |
| rsmZ forward <sup>a</sup>   | CCCACTCTTCAGTCCCTCGT                                                                           | This study |
| rsmZ reverse <sup>a</sup>   | AACACGCAACCCCGAAGGAT                                                                           | This study |
| rpoD forward                | ACAAGATCCGCAAGGTACTGAAG                                                                        | 15         |
| rpoD reverse                | CGCCCAGGTGCGAATC                                                                               | 15         |
| phrS forward <sup>a</sup>   | CGTTCTCGCAGGGATTCTTA                                                                           | This study |
| phrS reverse <sup>a</sup>   | CCTTGCGTGCTCTGTGTATC                                                                           | This study |
| prfF forward <sup>a</sup>   | AACTGGTCGCGAGATCAGC                                                                            | This study |
| prfF reverse <sup>a</sup>   | CCGTGATTAGCCTGATGAGGAG                                                                         | This study |
| prfH forward <sup>a</sup>   | CGATGGAATGAATGAGAACCG                                                                          | This study |
| prfH reverse <sup>a</sup>   | TTGGTCTCTCAGCTTACCTG                                                                           | This study |
| retS_UpF-GWL <sup>a</sup>   | TACAAAAAAGCAGGCTGTGCTGGACGAAGTGATCTACCC                                                        | This study |
| retS_UpR-GM <sup>a</sup>    | TCAGAGCGCTTTTGAAGCTAATTCGGAGTAGTCCTATGGC<br>GATCCGAA                                           | This study |
| retS_DnF-GM <sup>a</sup>    | AGGAACTTCAAGATCCCCAATTCGTGAGCTGATCGCCTAC<br>TGGGTC                                             | This study |
| retS_DnR-GWR <sup>a</sup>   | TACAAGAAAGCTGGGTAAGAGGATGAAGATGTAGCGGCC                                                        | This study |
| Gm-F                        | CGAATTAGCTTCAAAAGCGCTCTGA                                                                      | 13         |
| Gm-R                        | CGAATTGGGGATCTTGAAGTTCCT                                                                       | 13         |
| GW-attB1                    | GGGGACAAGTTTGTACAAAAAAGCAGGCT                                                                  | 13         |
| GW-attB2                    | GGGGACCACTTTGTACAAGAAAGCTGGGT                                                                  | 13         |
| spa forward <sup>b</sup>    | CAAACGGCACTACTGCTGAC                                                                           | This study |
| spa reverse <sup>b</sup>    | CATGGTTTGCTGGTTGCTTC                                                                           | This study |
| hla forward <sup>b</sup>    | AGCGAAGTCTGGTGAAAACC                                                                           | This study |
| hla reverse <sup>b</sup>    | CGGTATATGGCAATCAACTTT                                                                          | This study |
| rnaIII forward <sup>b</sup> | GCACTGAGTCCAAGGAACTAAC                                                                         | This study |
| rnaIII reverse <sup>b</sup> | AAGCCATCCCACTTAATAACC                                                                          | This study |
| iles forward <sup>b</sup>   | ACATACAGCACCAGGTCACG                                                                           | This study |
| iles reverse <sup>b</sup>   | CGCCTTCTTCAGTAAATACACC                                                                         | This study |

<sup>a</sup>*P. aeruginosa* PAO1, GeneBank accession no. NC\_2516.2 used to design primers.

<sup>b</sup>*S. aureus* 8325-4, GeneBank accession no. CP000253 used to design primers.

**Table S3.** Pearson coefficients from all Scatter plots.

| Scatter plot                 | Pearson coefficient |
|------------------------------|---------------------|
| 5-DMSO-1 vs 5-DMSO-2         | 1.00                |
| 5-ajoene-1 vs 5-ajoene-2     | 0.97                |
| 60-DMSO-1 vs 60-DMSO-2       | 0.99                |
| 60-ajoene-1 vs 60-ajoene-2   | 0.96                |
| 240-DMSO-1 vs 240-DMSO-2     | 0.99                |
| 240-ajoene-1 vs 240-ajoene-2 | 1.00                |

## Supplementary material and methods

### Static biofilm formation

*P. aeruginosa*: O.N. cultures of *wt* PAO1 and  $\Delta$ *gacA* were diluted to an OD<sub>450</sub> of 0.02 in fresh AB minimal medium supplemented with 0.5% (wt/vol) glucose and 0.5% (wt/vol) Casamino acids and then incubated in 96 well polystyrene microtiter plates (Sterilin<sup>®</sup> Ltd) at 37°C for 16 hours with and without different concentrations of ajoene.

*S. aureus*: O.N. culture of *S. aureus* 8325-4 were diluted 1:100 in fresh TSB media and then incubated in 96 well polystyrene plates (Sterilin<sup>®</sup> Ltd) at 37°C for 24 hours with and without different concentrations of ajoene.

Media was removed and wells washed with 0,9% NaCl to remove non-adherent cells. Adherent cells were stained for 30 min. with 0.1% crystal violet (CV) (Sigma) solution and washed twice with 0.9% NaCl to remove non-bound CV. 96% EtOH were added to dissolve bound CV and formation of biofilm were measured using a microplate reader (Victor X, PerkinElmer) by determination of OD<sub>590</sub>.

### Extracellular DNA

O.N. culture of PAO1 was diluted to an OD<sub>600</sub> of 0.001 in fresh AB minimal medium

supplemented with 0.5% (wt/vol) glucose and 0.05 mM propidium iodide and then incubated in 96 well polystyrene microtiter plates (Sterilin<sup>®</sup> Ltd) at 37°C for 16 hours with and without different concentrations of ajoene. Propidium iodide and growth was measured using a microplate reader (Victor X, PerkinElmer) by determination of OD<sub>480nm</sub> and OD<sub>600nm</sub>, respectively<sup>16</sup>.

### **Exopolysaccharide production**

Agar (1%) plates supplemented with tryptone (1%), Congo red (40 mg/ml) and ajoene in concentrations of 40 µg/ml and 80 µg/ml as well as one with no addition of ajoene were used. From O.N. cultures of *wt* PAO1 and a *rsmYZ* mutant 5 µl were added on top of the plates and incubated at RT for 5 days, where after, colony staining were visually inspected.

### **Western blot analysis of T3SS and T6SS**

Detection of PcrV and Hcp1 in *P. aeruginosa* cell lysates was performed as described in Moscoso *et al.*<sup>17</sup>. Briefly, *P. aeruginosa* PAK strain was inoculated into LB or TSB medium to an OD<sub>600</sub> of 0.1 and incubated at 37°C for 6 hours, shaking. Lysates were separated by SDS-PAGE using a 12% resolving gel. Primary antibodies, anti-Hcp1 and anti-PcrV were used at 1:500 and 1:1000 dilutions, respectively. The same membrane was probed with the two primary antibodies. No loading control was used but two independent experiments were performed.

### **Mobility shift detection of phosphorylated GacA**

*P. aeruginosa* cultures were grown according to the description in the manuscript “*RNA preparation*” without and with ajoene (80 µg/ml). Samples were retrieved at early stationary phase (OD<sub>600</sub> of 2.2). Lysates were separated by SuperSep Phos-tag 12.5 %



gel (Wako, Japan) and subsequently analyzed by Western blot with a primary anti-GacA antibody<sup>18</sup>.

### Supplementary material references

- 1 Novick, R. P. & Morse, S. I. In vivo transmission of drug resistance factors between strains of *Staphylococcus aureus*. *The Journal of experimental medicine* **125**, 45-59 (1967).
- 2 Chan, P. F. & Foster, S. J. The role of environmental factors in the regulation of virulence-determinant expression in *Staphylococcus aureus* 8325-4. *Microbiology* **144** ( Pt 9), 2469-2479, doi:10.1099/00221287-144-9-2469 (1998).
- 3 Horsburgh, M. J. *et al.* sigmaB modulates virulence determinant expression and stress resistance: characterization of a functional rsbU strain derived from *Staphylococcus aureus* 8325-4. *Journal of bacteriology* **184**, 5457-5467 (2002).
- 4 Kay, E. *et al.* Two GacA-dependent small RNAs modulate the quorum-sensing response in *Pseudomonas aeruginosa*. *Journal of bacteriology* **188**, 6026-6033, doi:10.1128/JB.00409-06 (2006).
- 5 Heurlier, K. *et al.* Positive control of swarming, rhamnolipid synthesis, and lipase production by the posttranscriptional RsmA/RsmZ system in *Pseudomonas aeruginosa* PAO1. *Journal of bacteriology* **186**, 2936-2945 (2004).
- 6 Reimann, C. *et al.* The global activator GacA of *Pseudomonas aeruginosa* PAO positively controls the production of the autoinducer N-butyryl-homoserine lactone and the formation of the virulence factors pyocyanin, cyanide, and lipase. *Molecular microbiology* **24**, 309-319 (1997).
- 7 Pessi, G. *et al.* The global posttranscriptional regulator RsmA modulates production of virulence determinants and N-acylhomoserine lactones in *Pseudomonas aeruginosa*. *Journal of bacteriology* **183**, 6676-6683, doi:10.1128/JB.183.22.6676-6683.2001 (2001).
- 8 Hentzer, M. *et al.* Inhibition of quorum sensing in *Pseudomonas aeruginosa* biofilm bacteria by a halogenated furanone compound. *Microbiology* **148**, 87-102 (2002).
- 9 Yang, L. *et al.* Computer-aided identification of recognized drugs as *Pseudomonas aeruginosa* quorum-sensing inhibitors. *Antimicrob Agents Chemother* **53**, 2432-2443, doi:AAC.01283-08 [pii] 10.1128/AAC.01283-08 (2009).
- 10 Bordi, C. *et al.* Regulatory RNAs and the HptB/RetS signalling pathways fine-tune *Pseudomonas aeruginosa* pathogenesis. *Mol Microbiol* **76**, 1427-1443, doi:10.1111/j.1365-2958.2010.07146.xMMI7146 [pii] (2010).
- 11 Rybtke, M. T. *et al.* Fluorescence-based reporter for gauging cyclic di-GMP levels in *Pseudomonas aeruginosa*. *Appl Environ Microbiol* **78**, 5060-5069, doi:10.1128/AEM.00414-12 AEM.00414-12 [pii] (2012).
- 12 Moller, S. *et al.* In situ gene expression in mixed-culture biofilms: evidence of metabolic interactions between community members. *Appl Environ Microbiol* **64**, 721-732 (1998).

- 13 Choi, K. H. & Schweizer, H. P. An improved method for rapid generation of unmarked *Pseudomonas aeruginosa* deletion mutants. *BMC microbiology* **5**, 30, doi:10.1186/1471-2180-5-30 (2005).
- 14 Hoang, T. T., Karkhoff-Schweizer, R. R., Kutchma, A. J. & Schweizer, H. P. A broad-host-range Flp-FRT recombination system for site-specific excision of chromosomally-located DNA sequences: application for isolation of unmarked *Pseudomonas aeruginosa* mutants. *Gene* **212**, 77-86 (1998).
- 15 Jakobsen, T. H. *et al.* Ajoene, a sulfur-rich molecule from garlic, inhibits genes controlled by quorum sensing. *Antimicrobial agents and chemotherapy* **56**, 2314-2325, doi:10.1128/AAC.05919-11 (2012).
- 16 Allesen-Holm, M. *et al.* A characterization of DNA release in *Pseudomonas aeruginosa* cultures and biofilms. *Mol Microbiol* **59**, 1114-1128, doi:10.1111/j.1365-2958.2005.05008.x (2006).
- 17 Moscoso, J. A., Mikkelsen, H., Heeb, S., Williams, P. & Filloux, A. The *Pseudomonas aeruginosa* sensor RetS switches type III and type VI secretion via c-di-GMP signalling. *Environmental microbiology* **13**, 3128-3138, doi:10.1111/j.1462-2920.2011.02595.x (2011).
- 18 Takeuchi, K. *et al.* Lon protease negatively affects GacA protein stability and expression of the Gac/Rsm signal transduction pathway in *Pseudomonas protegens*. *Environmental microbiology* **16**, 2538-2549, doi:10.1111/1462-2920.12394 (2014).
